# Supplementary material for: Occurrence and Reduction of Biogenic Amines in Kimchi and Korean Fermented Seafood Products
Source: PubMed Central journal article supplement (PMC6915361; doi:10.3390/foods8110547), 2019-11-04
Supplement: foods-08-00547-s001.pdf [file foods-08-00547-s001.pdf]

**Table S1.** Biogenic amine content of fermented vegetable and seafood products from various countries.

| Vegetable and Fermented Seafood Products                           | N <sup>1</sup> | Biogenic Amines (mg/kg) <sup>2</sup> |     |            |                       |                      |             |         |       | Ref. |
|--------------------------------------------------------------------|----------------|--------------------------------------|-----|------------|-----------------------|----------------------|-------------|---------|-------|------|
|                                                                    |                | TRP                                  | PHE | PUT        | CAD                   | HIS                  | TYR         | SPD     | SPM   |      |
| Sauerkraut<br>(fermented white cabbage)                            | 50             | NT <sup>3</sup>                      | NT  | NT         | NT                    | 9.1–130 <sup>4</sup> | NT          | NT      | NT    | [35] |
|                                                                    | 8              | NT                                   | 0–9 | 6–550      | 1–311                 | 1–104                | 2–192       | NT      | NT    | [15] |
| <i>Tsukemono</i><br>(fermented, salted, and/or pickled vegetables) | 39             | NT                                   | NT  | 0.4–61.7   | ND <sup>5</sup> -28.9 | ND-264               | ND-369      | ND-17.2 | NT    | [37] |
| Mustard pickle<br>(salted and fermented mustard green)             | 37             | ND-155                               | ND  | ND-131     | ND-24                 | ND-89                | ND-43       | ND      | ND-95 | [38] |
| <i>Cincolok</i><br>(salted and fermented shrimp)                   | 10             | ND-25.3                              | NT  | 10.6–803.4 | NT                    | 6.8–257.8            | 156.1–681.2 | ND-2.2  | NT    | [51] |
| <i>Budu</i><br>(salted and fermented anchovy)                      | 8              | ND-317.6                             | NT  | 28.4–64.9  | NT                    | 99.0–372.9           | 58.0–852.6  | 3.0–7.0 | NT    | [51] |
|                                                                    | 12             | NT                                   | NT  | NT         | NT                    | 222.1–1064.0         | NT          | NT      | NT    | [52] |

<sup>1</sup> N: Number of samples examined; <sup>2</sup> TRP: tryptamine, PHE:  $\beta$ -phenylethylamine, PUT: putrescine, CAD: cadaverine, HIS: histamine, TYR: tyramine, SPD: spermidine, SPM: spermine; <sup>3</sup> NT: not tested; <sup>4</sup> Values are the minimum and maximum concentrations reported. The same number of digits is used after the decimal point in the values, as was presented in the corresponding references; <sup>5</sup> ND: not detected.
